# Supplementary material
Source: ML conference proceedings conference paper supplement (https://openaccess.thecvf.com/content/CVPR_2019/html/Rebecq_Events-To-Video_Bringing_Modern_CVPR_2019_paper.html)
Supplement: Supplementary file 2 [file Rebecq_Events-To-Video_Bringing_Modern_CVPR_2019_supplemental.zip]

Archive with 2 entries (2 files):
- 1595-supp.pdf
- 1595-video.mp4
